# Supplementary material for: Bacterial and Fungal Diversity Inside the Medieval Building Constructed with Sandstone Plates and Lime Mortar as an Example of the Microbial Colonization of a Nutrient-Limited Extreme Environment (Wawel Royal Castle, Krakow, Poland)
Source: MDPI journal article supplement (doi:10.3390/microorganisms7100416), 2019-10-03
Supplement: s1 [file s1]

**Table S1.** Diversity and evenness indices for microorganisms detected in different sampling periods and material types.

|         | Ancient walls -sand-like/dust samples |          |          |          | Indoor air sampled onto agar plates |          |          |          |
|---------|---------------------------------------|----------|----------|----------|-------------------------------------|----------|----------|----------|
|         | bacteria                              |          | fungi    |          | bacteria                            |          | fungi    |          |
|         | shannon                               | pielou   | shannon  | pielou   | shannon                             | pielou   | shannon  | pielou   |
| April   | 7.381356                              | 0.830986 | 4.166877 | 0.446459 | 4.556695                            | 0.740956 | 3.789885 | 0.646961 |
| June    | 7.556157                              | 0.767107 | 4.925773 | 0.491478 | 4.200664                            | 0.769432 | 4.319733 | 0.650184 |
| August  | 7.715185                              | 0.764028 | 4.683442 | 0.450154 | 4.755116                            | 0.714173 | 4.027622 | 0.676434 |
| October | 7.558044                              | 0.744560 | 5.09555  | 0.512880 | 4.296659                            | 0.673981 | 2.775719 | 0.502523 |

**Table S2.** Number of microorganisms detected in sand-like/dust samples and air sampled onto agar plates.

|                                                                         | April | June | August | October |
|-------------------------------------------------------------------------|-------|------|--------|---------|
| <b>Bacterial diversity of sand-like/dust samples from ancient walls</b> |       |      |        |         |
| At family level                                                         | 142   | 199  | 232    | 240     |
| At genus level                                                          | 201   | 337  | 399    | 421     |
| <b>Fungal diversity of sand-like/dust samples from ancient walls</b>    |       |      |        |         |
| At family level                                                         | 181   | 238  | 266    | 226     |
| At genus level                                                          | 297   | 470  | 548    | 439     |
| <b>Bacterial diversity of air sampled onto agar plates</b>              |       |      |        |         |
| At family level                                                         | 23    | 11   | 22     | 28      |
| At genus level                                                          | 33    | 17   | 27     | 41      |
| <b>Fungal diversity of air sampled onto agar plates</b>                 |       |      |        |         |
| At family level                                                         | 26    | 46   | 22     | 21      |
| At genus level                                                          | 34    | 60   | 33     | 34      |
| <b>Bacteria detected in both sand-like/dust and air samples</b>         |       |      |        |         |
| At family level                                                         | 13    | 11   | 20     | 26      |
| At genus level                                                          | 10    | 16   | 19     | 28      |
| <b>Fungi detected in both sand-like/dust and air samples</b>            |       |      |        |         |
| At family level                                                         | 23    | 44   | 22     | 21      |
| At genus level                                                          | 30    | 54   | 32     | 24      |

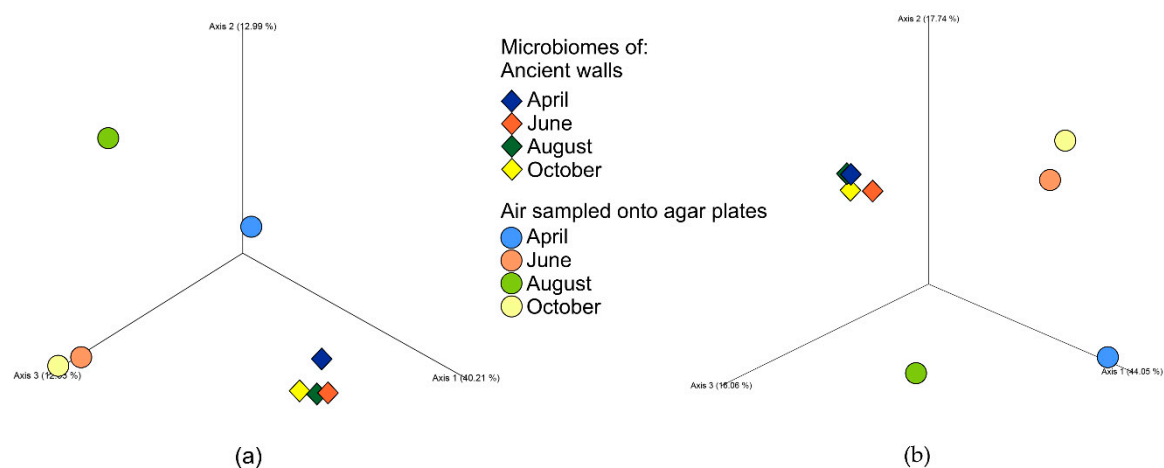

**Figure S1.** Principal Coordinates Analysis (PCoA) of Bray–Curtis dissimilarity for: (a) bacteria and (b) fungi

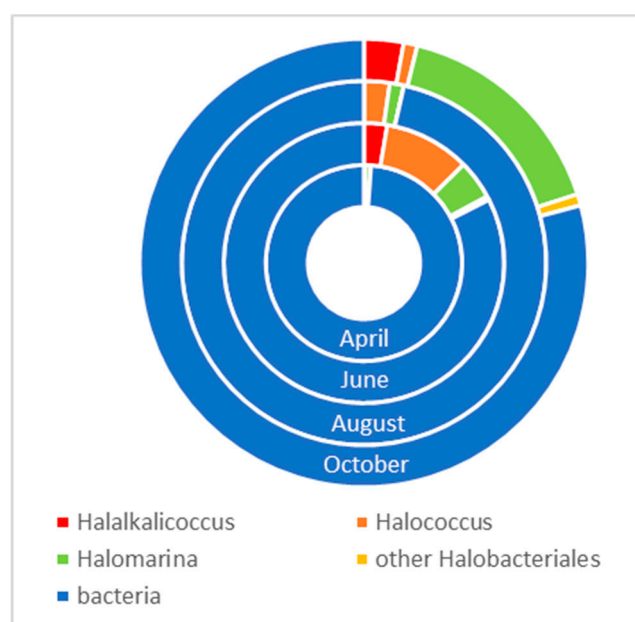

**Figure S2.** Microbial community structure for samples collected from ancient walls, including unfiltered archaeal sequences of amplicons of 16S rDNA.
